# Supplementary material for: Insights into the interaction mechanism between tiagabine hydrochloride and two serum albumins
Source: Royal Society of Chemistry journal article supplement (doi:10.1039/c8ra04153a), 2018-01-01
Supplement: c8ra04153a1.pdf [file c8ra04153a1.pdf]

## Electronic Supplementary Information (ESI)

### Insights into the interaction mechanism between tiagabine hydrochloride and two serum albumins

*Weiling Zhuo,<sup>a</sup> Xilin Peng,<sup>b</sup> Xiang Lin<sup>\*a</sup>*

<sup>a</sup>School of Chemical Engineering, Sichuan University, Chengdu 610065, People's Republic of China; E-mail address: linxiang@scu.edu.cn

<sup>b</sup>Sinopharm Chuankang Pharmaceutical Co.,Ltd., Chengdu 611731, People's Republic of China

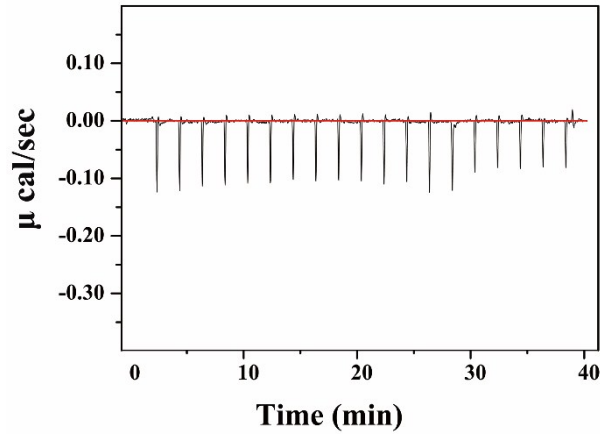

**Fig. S1** ITC profile for the titration of TGB into buffer at pH 7.4 and 298 K. The concentration of TGB is 2 mM.

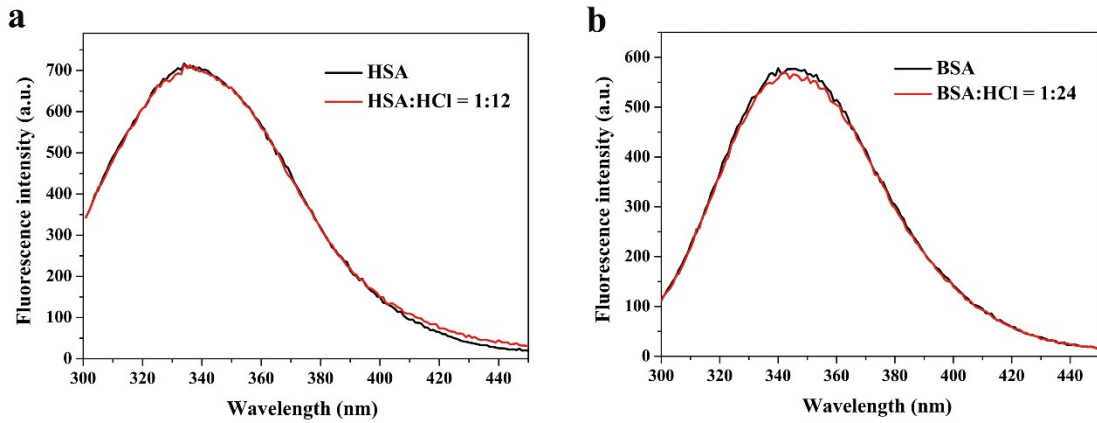

**Fig. S2 (a)** Fluorescence spectra of HSA and HSA-HCl complex at pH 7.4 and 298 K. The concentration of HSA is 2.4  $\mu\text{M}$ , and the molar ratio of HSA to HCl is 1:12. **(b)** Fluorescence spectra of BSA and BSA-HCl complex at pH 7.4 and 298 K. The concentration of BSA is 0.7  $\mu\text{M}$ , and the molar ratio of BSA to HCl is 1:24.

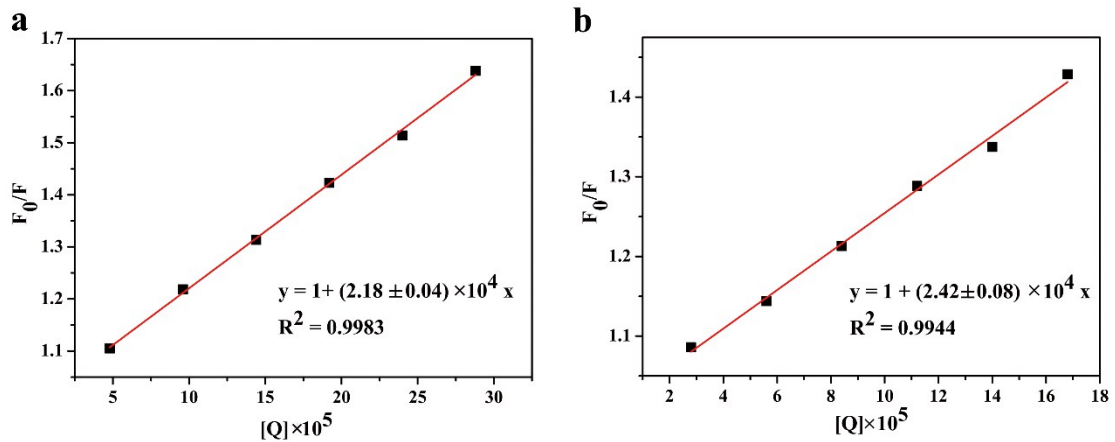

**Fig. S3** Linear fitting diagrams of Stern-Volmer equation for the fluorescence quenching of TGB-HSA (a) and TGB-BSA (b), respectively.
